# Supplementary material
Source: ML conference proceedings conference paper supplement (https://openreview.net/forum?id=1gLyEmOsKE8)
Supplement: supplementary_material [file attachment]

# Supplementary Material

## 431 A Tsallis-perspective: Proofs

432 To prove Lemma 1 we need the following technical result that gives an expression for the Hessian of  
433 the Tsallis-perspective  $H$  in terms of the (scalar) derivatives of  $h$ .

434 **Lemma 6.** *The Hessian of  $H$  (Eq. (1)) at any point  $x \in \mathbb{R}_+^d$  can be expressed as:*

$$\begin{aligned} \nabla^2 H(x) &= -\frac{1}{4} \|x\|_1^{-\frac{3}{2}} \sum_{i=1}^d h\left(\frac{x_i}{\|x\|_1}\right) z z^\top \\ &\quad + \|x\|_1^{-\frac{7}{2}} \sum_{i=1}^d x_i^2 h''\left(\frac{x_i}{\|x\|_1}\right) z_i z_i^\top \\ &\quad + \frac{1}{2} \|x\|_1^{-\frac{5}{2}} \sum_{i=1}^d x_i h'\left(\frac{x_i}{\|x\|_1}\right) (z z_i^\top + z_i z^\top), \end{aligned}$$

435 where  $z = \mathbf{1}_d$  is the all-ones vector, and  $z_i = \mathbf{1}_d - (\|x\|_1/x_i)\mathbf{e}_i$  for all  $i \in [d]$ .

436 *Proof.* Let us first compute the first and second derivatives of  $f(x) = \sqrt{\|x\|_1}$  and  $g_i(x) = h(x_i/\|x\|_1)$   
437 for a fixed  $i \in [d]$ :

$$\begin{aligned} \nabla f(x) &= \frac{1}{2} \|x\|_1^{-\frac{1}{2}} z; \\ \nabla^2 f(x) &= -\frac{1}{4} \|x\|_1^{-\frac{3}{2}} z z^\top; \\ \nabla g_i(x) &= h'\left(\frac{x_i}{\|x\|_1}\right) \left(\frac{1}{\|x\|_1} \mathbf{e}_i - \frac{x_i}{\|x\|_1^2} z\right) \\ &= -\frac{x_i}{\|x\|_1^2} h'\left(\frac{x_i}{\|x\|_1}\right) z_i; \\ \nabla^2 g_i(x) &= h''\left(\frac{x_i}{\|x\|_1}\right) \left(\frac{1}{\|x\|_1} \mathbf{e}_i - \frac{x_i}{\|x\|_1^2} z\right) \left(\frac{1}{\|x\|_1} \mathbf{e}_i - \frac{x_i}{\|x\|_1^2} z\right)^\top \\ &\quad + h'\left(\frac{x_i}{\|x\|_1}\right) \left(-\frac{1}{\|x\|_1^2} z \mathbf{e}_i^\top - \frac{1}{\|x\|_1^2} \mathbf{e}_i z^\top + \frac{2x_i}{\|x\|_1^3} z z^\top\right) \\ &= \frac{x_i^2}{\|x\|_1^4} h''\left(\frac{x_i}{\|x\|_1}\right) z_i z_i^\top + \frac{x_i}{\|x\|_1^3} h'\left(\frac{x_i}{\|x\|_1}\right) (z z_i^\top + z_i z^\top). \end{aligned}$$

438 Using the formula for the Hessian of a product, we now obtain:

$$\begin{aligned} \nabla^2(f(x)g_i(x)) &= (\nabla^2 f(x))g_i(x) + \nabla f(x)\nabla g_i(x)^\top + \nabla g_i(x)\nabla f(x)^\top + f(x)(\nabla^2 g_i(x)) \\ &= -\frac{1}{4} \|x\|_1^{-\frac{3}{2}} h\left(\frac{x_i}{\|x\|_1}\right) z z^\top - \frac{1}{2} \|x\|_1^{-\frac{5}{2}} x_i h'\left(\frac{x_i}{\|x\|_1}\right) (z z_i^\top + z_i z^\top) \\ &\quad + \|x\|_1^{-\frac{7}{2}} x_i^2 h''\left(\frac{x_i}{\|x\|_1}\right) z_i z_i^\top + \|x\|_1^{-\frac{5}{2}} x_i h'\left(\frac{x_i}{\|x\|_1}\right) (z z_i^\top + z_i z^\top) \\ &= -\frac{1}{4} \|x\|_1^{-\frac{3}{2}} h\left(\frac{x_i}{\|x\|_1}\right) z z^\top + \|x\|_1^{-\frac{7}{2}} x_i^2 h''\left(\frac{x_i}{\|x\|_1}\right) z_i z_i^\top + \frac{1}{2} \|x\|_1^{-\frac{5}{2}} x_i h'\left(\frac{x_i}{\|x\|_1}\right) (z z_i^\top + z_i z^\top). \end{aligned}$$

439 Summing this over  $i = 1, \dots, d$ , we obtain the expression for the Hessian  $\nabla^2 H(x)$ . ■

440 *Proof of Lemma 1.* Fix  $x \in \mathbb{R}_+^d$  and let  $y_i = x_i/\|x\|_1$  for all  $i$ . By Lemma 6 the Hessian of  $H$  can be  
 441 written as

$$\nabla^2 H(x) = \frac{1}{4} \|x\|_1^{-\frac{3}{2}} \sum_{i=1}^d \left( -h(y_i) z z^\top + 4y_i^2 h''(y_i) z_i z_i^\top + 2y_i h'(y_i) (z z_i^\top + z_i z^\top) \right),$$

442 where  $z = \mathbf{1}_d$  is the all-ones vector, and  $z_i = \mathbf{1}_d - (\|x\|_1/x_i) \mathbf{e}_i$  for all  $i \in [d]$ . Then, using the  
 443 condition on  $h$  and since  $\sum_{i=1}^d y_i z_i = 0$  we have

$$\begin{aligned} \nabla^2 H(x) &\geq \frac{\lambda_h}{4} \|x\|_1^{-\frac{3}{2}} J + \frac{1}{4} \|x\|_1^{-\frac{3}{2}} \sum_{i=1}^d \left( \frac{(h'(y_i) - c_h)^2}{\frac{1}{2} h''(y_i)} z z^\top + 4y_i^2 h''(y_i) z_i z_i^\top + 2y_i h'(y_i) (z z_i^\top + z_i z^\top) \right) \\ &= \frac{\lambda_h}{4} \|x\|_1^{-\frac{3}{2}} J + \frac{1}{4} \|x\|_1^{-\frac{3}{2}} \sum_{i=1}^d \left( \frac{(h'(y_i) - c_h)^2}{\frac{1}{2} h''(y_i)} z z^\top + 4y_i^2 h''(y_i) z_i z_i^\top + 2y_i (h'(y_i) - c_h) (z z_i^\top + z_i z^\top) \right) \\ &= \frac{\lambda_h}{4} \|x\|_1^{-\frac{3}{2}} J + \frac{1}{4} \|x\|_1^{-\frac{3}{2}} \sum_{i=1}^d \left( \frac{h'(y_i) - c_h}{\sqrt{\frac{1}{2} h''(y_i)}} z + 2y_i \sqrt{\frac{1}{2} h''(y_i)} z_i \right) \left( \frac{h'(y_i) - c_h}{\sqrt{\frac{1}{2} h''(y_i)}} z + 2y_i \sqrt{\frac{1}{2} h''(y_i)} z_i \right)^\top \\ &\quad + \frac{\lambda_h}{4} \|x\|_1^{-\frac{3}{2}} \sum_{i=1}^d y_i^2 h''(y_i) z_i z_i^\top, \end{aligned}$$

444 and the result follows since each term in the first summation is psd.  $\blacksquare$

## 445 B Proof of Main Result

446 In this section we provide the proof of Theorem 1. In Appendix B.1 we prove useful lemmas which  
 447 provide us with stability properties of the FTRL iterates. In Appendix B.2 and Appendix B.3 we  
 448 bound the stability and penalty terms (RHS of Eq. (6) and Eq. (5)) towards proving Theorem 2 in  
 449 Appendix B.4. We then prove Theorem 1 in Appendix B.5.

### 450 B.1 Stability of Iterates

451 We first establish a technical stability property of the FTRL updates that is crucial for bounding  
 452 the stability term (Eq. (6)). This property asserts that for every time step  $t$ , the clique marginal  
 453 probabilities induced by  $p_t$  are close, up to a constant multiplicative factor, to the clique marginals  
 454 induced by  $p_t^+$ , where  $p_t^+ \triangleq \arg \min_{p \in \mathcal{S}_N^y} \{\widehat{L}_t \cdot p + R_t(p)\}$ . The proof uses properties of the log-  
 455 barrier component  $\Phi$ , and relies on an adaptation of an argument of Jin and Luo [13].

456 **Lemma 7.** For all time steps  $t$  and cliques  $V_k$  it holds that  $p_t^+(V_k) \leq \frac{7}{3} p_t(V_k)$ , where  $p_t^+ \triangleq$   
 457  $\arg \min_{p \in \mathcal{S}_N^y} \{\widehat{L}_t \cdot p + R_t(p)\}$ .

458 *Proof.* We define:

$$\begin{aligned} F_t(p) &= \widehat{L}_{t-1} \cdot p + R_t(p), \\ F_t^+(p) &= \widehat{L}_t \cdot p + R_t(p), \end{aligned}$$

459 so that  $p_t = \arg \min_{p \in \mathcal{S}_N^y} \{F_t(p)\}$  and  $p_t^+ = \arg \min_{p \in \mathcal{S}_N^y} \{F_t^+(p)\}$ . Note that  $\nabla^2 \Phi(p)$  is a block  
 460 diagonal matrix, with the block corresponding to the clique  $V_k$  being exactly  $\frac{9}{p(V_k)^2} J_{V_k}$  where  $J_{V_k}$  is  
 461 the  $|V_k| \times |V_k|$  all-ones matrix. A straightforward calculation then shows that for all  $p, p', p'' \in \mathcal{S}_N$   
 462 it holds that:

$$\|p' - p''\|_{\nabla^2 \Phi(p)}^2 = 9 \sum_{k=1}^K \frac{(p'(V_k) - p''(V_k))^2}{p(V_k)^2}.$$

463 It suffices to prove that  $\|p_t^+ - p_t\|_{\nabla^2 \Phi(p_t)}^2 \leq 16$ . This is because by the calculation we just made, we  
 464 have  $(p_t^+(V_k) - p_t(V_k))^2 \leq (\frac{4}{3} p_t(V_k))^2$  which is what we want to prove. It then suffices to show  
 465 that for any  $p' \in \mathcal{S}_N^y$  with  $\|p' - p_t\|_{\nabla^2 \Phi(p_t)}^2 = 16$  we have  $F_t^+(p') \geq F_t^+(p_t)$ . This is because as

466 an implication of that,  $p_t^+$  which minimizes the convex function  $F_t^+$ , must be within the convex set  
 467  $\{p : \|p - p_t\|_{\nabla^2\Phi(p_t)}^2 \leq 16\}$ . We proceed to lower bound  $F_t^+(p')$  as follows:

$$\begin{aligned} F_t^+(p') &= F_t^+(p_t) + \nabla F_t^+(p_t)^\top (p' - p_t) + \frac{1}{2} \|p' - p_t\|_{\nabla^2 R_t(\xi)}^2 \\ &= F_t^+(p_t) + \nabla F_t(p_t)^\top (p' - p_t) + \widehat{\ell}_t^\top (p' - p_t) + \frac{1}{2} \|p' - p_t\|_{\nabla^2 R_t(\xi)}^2 \\ &\geq F_t^+(p_t) + \widehat{\ell}_t^\top (p' - p_t) + \frac{1}{2} \|p' - p_t\|_{\nabla^2\Phi(\xi)}^2, \end{aligned}$$

468 where the first equality is a Taylor expansion of  $F_t^+$  around  $p_t$ , with  $\xi$  being a point between  $p'$  and  $p_t$ ,  
 469 and the last inequality is due to first-order optimality conditions and the fact that  $\nabla^2 R_t(\xi) \geq \nabla^2\Phi(\xi)$   
 470 since  $\Psi$  is convex. Note that since  $\|p' - p_t\|_{\nabla^2\Phi(p_t)}^2 = 16$ , by the same argument as in the beginning  
 471 of the proof we conclude that  $p'(V_k) \leq \frac{7}{3}p_t(V_k)$ . Since  $\xi$  lies between  $p_t$  and  $p'$  we conclude the  
 472 same ratio bound for  $\xi$ . We can thus bound the last term as follows:

$$\begin{aligned} \frac{1}{2} \|p' - p_t\|_{\nabla^2\Phi(\xi)}^2 &= \frac{9}{2} \sum_{k=1}^K \frac{(p'(V_k) - p_t(V_k))^2}{(\xi(V_k))^2} \\ &\geq \frac{9}{2 \cdot (\frac{7}{3})^2} \sum_{k=1}^K \frac{(p'(V_k) - p_t(V_k))^2}{p_t(V_k)^2} \\ &= \frac{9}{2 \cdot 49} \|p' - p_t\|_{\nabla^2\Phi(p_t)}^2 \\ &= \frac{72}{49} \geq 1. \end{aligned}$$

473 It now suffices to show that  $\widehat{\ell}_t^\top (p' - p_t) \geq -1$ ; indeed,

$$\widehat{\ell}_t^\top (p' - p_t) = \sum_{i \in V(I_t)} \frac{\ell_{t,i}}{p_t(V(I_t))} (p'_{t,i} - p_{t,i}) \geq -\frac{1}{p_t(V(I_t))} \sum_{i \in V(I_t)} \ell_{t,i} p_{t,i} \geq -1,$$

474 and the proof is complete. ■

475 The following lemma showcases another stability property that relates  $p_t$  to  $p_t^+$ . A corollary of this  
 476 lemma is that the pseudo-regret of the iterates  $p_t$  can only be larger than the pseudo-regret of the  
 477 iterates  $p_t^+$ , and it is used in the proof of Theorem 1 in Appendix B.5.

478 **Lemma 8.** *For all time steps  $t$  it holds that*

$$p_t^+ \cdot \widehat{\ell}_t \leq p_t \cdot \widehat{\ell}_t,$$

479 where  $p_t^+ \triangleq \arg \min_{p \in \mathcal{S}_N^y} \{\widehat{L}_t \cdot p + R_t(p)\}$ .

480 *Proof.* Since  $p_t^+$  is a minimizer of  $\widehat{L}_t \cdot p + R_t(p)$  and  $p_t$  is a minimizer of  $\widehat{L}_{t-1} \cdot p + R_t(p)$ , we have:

$$\begin{aligned} \widehat{L}_t \cdot p_t^+ + R_t(p_t^+) &\leq \widehat{L}_t \cdot p_t + R_t(p_t) \\ &= \widehat{\ell}_t \cdot p_t + \widehat{L}_{t-1} \cdot p_t + R_t(p_t) \\ &\leq \widehat{\ell}_t \cdot p_t + \widehat{L}_{t-1} \cdot p_t^+ + R_t(p_t^+), \end{aligned}$$

481 and the claim follows by rearranging terms. ■

## 482 B.2 Proof of Lemma 5 (Stability)

483 We now restate Lemma 5 which bounds the stability term to include extra constants which appear in  
 484 the bound.

485 **Lemma 5** (restated). *The following holds for all time steps  $t$ :*

$$\mathbb{E}[(\|\widehat{\ell}_t - \ell_{t,i^\star} \mathbf{1}\|_t^*)^2] = 56 \sum_{k \neq k^\star} \sqrt{\mathbb{E}[p_t(V_k)]} + 8\sqrt{\mathbb{E}[p_t^+(V_{k^\star} \setminus i^\star)]}.$$

486 Here  $\|g\|_t^* = \sqrt{g^\top (\nabla^2 \Psi(\tilde{p}_t))^{-1} g}$  is the dual local norm induced by  $\Psi$  at  $\tilde{p}_t$  for some intermediate  
487 point  $\tilde{p}_t \in [p_t, p_t^+]$ , where  $p_t^+ = \arg \min_{p \in \mathcal{S}_N^+} \{\widehat{L}_t \cdot p + R_t(p)\}$ .

488 *Proof.* By Lemma 2,  $\nabla^2 \Psi(\tilde{p}_t)$  is lower bounded by a diagonal matrix  $D_t$  in which the  $i$ 'th diagonal  
489 entry corresponding to  $i \in V_k$  is  $\left(2\sqrt{\tilde{p}_t(V_k)} \tilde{p}_{t,i}\right)^{-1}$ . Equivalently it holds that  $(\nabla^2 \Psi(\tilde{p}_t))^{-1} \leq D_t^{-1}$ .  
490 Using this fact and the fact that  $\ell_{t,i} = 0$  for  $i \notin V(I_t)$  we have

$$\begin{aligned} \mathbb{E}[(\|\widehat{\ell}_t - \ell_{t,i^\star} \mathbf{1}\|_t^*)^2] &= \mathbb{E}\left[(\widehat{\ell}_t - \ell_{t,i^\star} \mathbf{1})^\top (\nabla^2 \Psi(\tilde{p}_t))^{-1} (\widehat{\ell}_t - \ell_{t,i^\star} \mathbf{1})\right] \\ &\leq 2\mathbb{E}\left[\sum_{k=1}^K \sqrt{\tilde{p}_t(V_k)} \sum_{i \in V_k} \tilde{p}_{t,i} (\widehat{\ell}_{t,i} - \ell_{t,i^\star})^2\right] \\ &= 2\mathbb{E}\left[\sqrt{\tilde{p}_t(V(I_t))} \sum_{i \in V(I_t)} \tilde{p}_{t,i} (\widehat{\ell}_{t,i} - \ell_{t,i^\star})^2\right] \end{aligned} \quad (7)$$

$$+ 2\mathbb{E}\left[\sum_{V_k \neq V(I_t)} \sqrt{\tilde{p}_t(V_k)} \sum_{i \in V_k} \tilde{p}_{t,i} (\ell_{t,i^\star})^2\right], \quad (8)$$

491 where in the final equality we split the sum over cliques into a term for  $V(I_t)$  and a sum over the rest  
492 of the cliques. We first show that the RHS of Eq. (7) is bounded as follows:

$$\mathbb{E}\left[\sqrt{\tilde{p}_t(V(I_t))} \sum_{i \in V(I_t)} \tilde{p}_{t,i} (\widehat{\ell}_{t,i} - \ell_{t,i^\star})^2\right] \leq 16 \sum_{k \neq k^\star} \sqrt{\mathbb{E}[p(V_k)]} + 4\sqrt{\mathbb{E}[p_t^+(V_{k^\star} \setminus i^\star)]}.$$

493 Indeed, due to Lemma 7 and the fact that  $\tilde{p}_t$  lies between  $p_t$  and  $p_t^+$  it holds that  $\tilde{p}_t(V_k) \leq 3p_t(V_k)$   
494 for all  $k$ . Plugging in the expression for the loss estimator  $\widehat{\ell}_t$  we obtain

$$\begin{aligned} \mathbb{E}\left[\sqrt{\tilde{p}_t(V(I_t))} \sum_{i \in V(I_t)} \tilde{p}_{t,i} (\widehat{\ell}_{t,i} - \ell_{t,i^\star})^2\right] &= \mathbb{E}\left[\sqrt{\tilde{p}_t(V(I_t))} \sum_{i \in V(I_t)} \tilde{p}_{t,i} \left(\frac{\ell_{t,i}}{p_t(V(I_t))} - \ell_{t,i^\star}\right)^2\right] \\ &\leq 2\mathbb{E}\left[p_t(V(I_t))^{-\frac{3}{2}} \sum_{i \in V(I_t)} \tilde{p}_{t,i} (\ell_{t,i} - p_t(V(I_t))\ell_{t,i^\star})^2\right] \\ &= 2\mathbb{E}\left[\sum_{k=1}^K p_t(V_k)^{-\frac{1}{2}} \sum_{i \in V_k} \tilde{p}_{t,i} (\ell_{t,i} - p_t(V_k)\ell_{t,i^\star})^2\right], \end{aligned}$$

495 where in the last equality we use the law of total expectation and the fact that conditioned on the  
496 history up until time step  $t$  (including the decision vector  $p_t$ ), the probability that  $I_t$  belongs to the  
497 clique  $V_k$  is exactly  $p_t(V_k)$ . In more detail:

$$\begin{aligned} &\mathbb{E}\left[p_t(V(I_t))^{-\frac{3}{2}} \sum_{i \in V(I_t)} \tilde{p}_{t,i} (\ell_{t,i} - p_t(V(I_t))\ell_{t,i^\star})^2\right] \\ &= \mathbb{E}\left[\mathbb{E}_t\left[p_t(V(I_t))^{-\frac{3}{2}} \sum_{i \in V(I_t)} \tilde{p}_{t,i} (\ell_{t,i} - p_t(V(I_t))\ell_{t,i^\star})^2\right]\right] \\ &= \mathbb{E}\left[\sum_{k=1}^K \Pr[I_t \in V_k \mid h_t] \cdot \mathbb{E}_t\left[p_t(V_k)^{-\frac{3}{2}} \sum_{i \in V_k} \tilde{p}_{t,i} (\ell_{t,i} - p_t(V_k)\ell_{t,i^\star})^2\right]\right] \end{aligned}$$

$$\begin{aligned}
&= \mathbb{E} \left[ \sum_{k=1}^K p_t(V_k) \cdot \mathbb{E}_t \left[ p(V_k)^{-\frac{3}{2}} \sum_{i \in V_k} \tilde{p}_{t,i} (\ell_{t,i} - p_t(V_k) \ell_{t,i^*})^2 \right] \right] \\
&= \mathbb{E} \left[ \mathbb{E}_t \left[ \sum_{k=1}^K p_t(V_k)^{-\frac{1}{2}} \sum_{i \in V_k} \tilde{p}_{t,i} (\ell_{t,i} - p_t(V_k) \ell_{t,i^*})^2 \right] \right] \\
&= \mathbb{E} \left[ \sum_{k=1}^K p_t(V_k)^{-\frac{1}{2}} \sum_{i \in V_k} \tilde{p}_{t,i} (\ell_{t,i} - p_t(V_k) \ell_{t,i^*})^2 \right],
\end{aligned}$$

498 where  $h_t$  denotes the history up to and including the choice of  $p_t$  at time step  $t$  (not including the  
499 choice of  $I_t$ ), and in the fourth equality we use linearity of expectation and the fact that  $p_t(V_k)$  is  
500 constant when conditioned on  $h_t$ . We proceed to bound the above term, while splitting the sum over  
501 cliques into a term for  $V_{k^*}$  and a sum for all of the other cliques:

$$\begin{aligned}
&\mathbb{E} \left[ \sum_{k=1}^K p_t(V_k)^{-\frac{1}{2}} \sum_{i \in V_k} \tilde{p}_{t,i} (\ell_{t,i} - p_t(V_k) \ell_{t,i^*})^2 \right] \\
&\leq \mathbb{E} \left[ \sum_{k \neq k^*} p_t(V_k)^{-\frac{1}{2}} \tilde{p}_t(V_k) \right] + \mathbb{E} \left[ p_t(V_{k^*})^{-\frac{1}{2}} \left( \sum_{i \in V_{k^*}, i \neq i^*} \tilde{p}_{t,i} + \tilde{p}_{t,i^*} (1 - p_t(V_{k^*})) \right)^2 \right] \\
&\leq 3 \mathbb{E} \left[ \sum_{k \neq k^*} \sqrt{p_t(V_k)} \right] + 2 \mathbb{E} \left[ \tilde{p}_t(V_{k^*})^{-\frac{1}{2}} \tilde{p}_t(V_{k^*} \setminus i^*) \right] + 3 \mathbb{E} [(1 - p_t(V_{k^*}))^2] \\
&\leq 6 \mathbb{E} \left[ \sum_{k \neq k^*} \sqrt{p_t(V_k)} \right] + 2 \mathbb{E} \left[ \sqrt{\tilde{p}_t(V_{k^*} \setminus i^*)} \right] \\
&\leq 8 \mathbb{E} \left[ \sum_{k \neq k^*} \sqrt{p_t(V_k)} \right] + 2 \mathbb{E} \left[ \sqrt{p_t^+(V_{k^*} \setminus i^*)} \right] \\
&\leq 8 \sum_{k \neq k^*} \sqrt{\mathbb{E}[p_t(V_k)]} + 2 \sqrt{\mathbb{E}[p_t^+(V_{k^*} \setminus i^*)]},
\end{aligned}$$

502 where in the last inequality we used Jensen's inequality. We now proceed to bound the RHS of  
503 Eq. (8):

$$\begin{aligned}
\mathbb{E} \left[ \sum_{V_k \neq V(I_t)} \sqrt{\tilde{p}_t(V_k)} \sum_{i \in V_k} \tilde{p}_{t,i} (\ell_{t,i^*})^2 \right] &\leq \mathbb{E} \left[ \sum_{V_k \neq V(I_t)} \tilde{p}_t(V_k)^{\frac{3}{2}} \right] \\
&\leq 6 \mathbb{E} \left[ \sum_{V_k \neq V(I_t)} p_t(V_k)^{\frac{3}{2}} \right] \tag{9}
\end{aligned}$$

$$\begin{aligned}
&= 6 \mathbb{E} \left[ \sum_{k=1}^K (1 - p_t(V_k)) p_t(V_k)^{\frac{3}{2}} \right] \tag{10} \\
&\leq 12 \mathbb{E} \left[ \sum_{k \neq k^*} \sqrt{p_t(V_k)} \right] \\
&\leq 12 \sum_{k \neq k^*} \sqrt{\mathbb{E}[p_t(V_k)]},
\end{aligned}$$

504 where in Eq. (9) we use Lemma 7 and the fact that  $\tilde{p}_t$  lies between  $p_t$  and  $p_t^+$ , in Eq. (10) we use the  
505 fact that the probability of the clique  $V_k$  not to be chosen at time step  $t$  is  $1 - p_t(V_k)$  and the last line  
506 uses Jensen's inequality. Combining the two bounds, we conclude the proof. ■

### 507 B.3 Proof of Lemma 4 (Penalty)

508 In this section we restate Lemma 4 which bounds the penalty term to include the extra constants and  
509 poly-log factors.

510 **Lemma 4** (restated). *The penalty term described in the RHS of Eq. (5) is bounded by*

$$9K \log \frac{1}{\gamma} + 5 \log^2 \frac{1}{\gamma} \sum_{t=1}^T \sum_{k \neq k^*} \sqrt{\frac{p_t(V_k)}{t}} + 2 \log \frac{1}{\gamma} \sum_{t=1}^T \sqrt{\frac{p_t(V_{k^*} \setminus i^*)}{t}}, \quad (11)$$

511 where  $p_i^\gamma = \begin{cases} \gamma & i \neq i^* \\ 1 - (N-1)\gamma & i = i^* \end{cases}$  for all  $i \in [N]$  and  $\frac{1}{\eta_0} \triangleq 0$ .

512 *Proof.* Noting that  $\Phi(\cdot) \geq 0$  we can bound the first term as follows:

$$\Phi(p^\gamma) - \Phi(p_1) \leq \Phi(p^\gamma) \leq 9K \log \frac{1}{\gamma}.$$

513 Continuing with the second part of the penalty term, note that by definition of  $p^\gamma$  we have  $p^\gamma(V_{k^*}) \geq$   
514  $p_t(V_{k^*})$  for all  $t$ . Also note that  $\Psi(p^\gamma) \leq -2\left(\log^2 \frac{1}{\gamma} + 1\right)\sqrt{p^\gamma(V_{k^*})}$ . We then have

$$\begin{aligned} \sum_{t=1}^T \left( \frac{1}{\eta_t} - \frac{1}{\eta_{t-1}} \right) (\Psi(p^\gamma) - \Psi(p_t)) &\leq \sum_{t=1}^T \left( \sqrt{t} - \sqrt{t-1} \right) \left( 2 \left( \log^2 \frac{1}{\gamma} + 1 \right) \sum_{k=1}^K \sqrt{p_t(V_k)} \right. \\ &\quad \left. + \sum_{k=1}^K \frac{1}{\sqrt{p_t(V_k)}} \sum_{i \in V_k} p_{t,i} \log \frac{p_t(V_k)}{p_{t,i}} - 2 \left( \log^2 \frac{1}{\gamma} + 1 \right) \sqrt{p^\gamma(V_{k^*})} \right) \\ &\leq 2 \left( \log^2 \frac{1}{\gamma} + 1 \right) \sum_{t=1}^T \frac{1}{\sqrt{t}} \sum_{k \neq k^*} \sqrt{p_t(V_k)} \\ &\quad + \log \frac{1}{\gamma} \sum_{t=1}^T \frac{1}{\sqrt{t}} \sum_{k \neq k^*} \sqrt{p_t(V_k)} \\ &\quad + \sum_{t=1}^T \frac{1}{\sqrt{t} \cdot p_t(V_{k^*})} \sum_{i \in V_{k^*}} p_{t,i} \log \frac{p_t(V_{k^*})}{p_{t,i}} \\ &\leq 5 \log^2 \frac{1}{\gamma} \sum_{t=1}^T \frac{1}{\sqrt{t}} \sum_{k \neq k^*} \sqrt{p_t(V_k)} \\ &\quad + \sum_{t=1}^T \frac{1}{\sqrt{t} \cdot p_t(V_{k^*})} \sum_{i \in V_{k^*}} p_{t,i} \log \frac{p_t(V_{k^*})}{p_{t,i}}, \end{aligned} \quad (12)$$

515 where the second inequality follows from the fact that  $\frac{1}{\sqrt{t}} - \frac{1}{\sqrt{t-1}} \leq \frac{1}{\sqrt{t}}$  and that  $p_{t,i} \geq \gamma$  for all  $t$  and  
516  $i$ . It is left to bound the final term. Using the inequality  $\log x \leq x - 1$  for all  $x > 0$  we have

$$\begin{aligned} \sum_{i \in V_{k^*}} p_{t,i} \log \frac{p_t(V_{k^*})}{p_{t,i}} &= \sum_{i \in V_{k^*} \setminus i^*} p_{t,i} \log \frac{p_t(V_{k^*})}{p_{t,i}} + p_{t,i^*} \log \frac{p_t(V_{k^*})}{p_{t,i^*}} \\ &\leq \log \frac{1}{\gamma} \sum_{i \in V_{k^*} \setminus i^*} p_{t,i} + p_{t,i^*} \left( \frac{p_t(V_{k^*})}{p_{t,i^*}} - 1 \right) \\ &= \left( \log \frac{1}{\gamma} + 1 \right) p_t(V_{k^*} \setminus i^*) \\ &\leq 2 \log \frac{1}{\gamma} p_t(V_{k^*} \setminus i^*). \end{aligned}$$

517 Plugging this bound into Eq. (12) while using the fact that  $\frac{p_t(V_{k^*} \setminus i^*)}{\sqrt{p_t(V_{k^*})}} \leq \sqrt{p_t(V_{k^*} \setminus i^*)}$  completes  
518 the proof. ■

519 **B.4 Proof of Theorem 2**

520 In order to prove Theorem 2 we make use of the following simple claim which asserts that the pseudo-  
 521 regret is bounded up to an additive constant factor by the regret with respect to some probability  
 522 vector in  $\mathcal{S}_N^\gamma$ .

523 **Lemma 9.** For all  $\gamma \in [0, \frac{1}{N}]$  and  $i^* \in [N]$  the following holds:

$$\mathbb{E} \left[ \sum_{t=1}^T p_t \cdot \widehat{\ell}_t - \mathbf{e}_{i^*} \cdot \sum_{t=1}^T \widehat{\ell}_t \right] \leq \mathbb{E} \left[ \sum_{t=1}^T p_t \cdot \widehat{\ell}_t - p^\gamma \cdot \sum_{t=1}^T \widehat{\ell}_t \right] + \gamma TN,$$

524 where  $p_i^\gamma = \begin{cases} \gamma & i \neq i^* \\ 1 - (N-1)\gamma & i = i^* \end{cases} \quad \forall i \in [N]$ .

525 *Proof.* Fix  $\gamma \in [0, \frac{1}{N}]$  and  $i^* \in [N]$ . Note that  $\mathbf{e}_{i^*} = p^\gamma - v$  where  $v$  is defined as follows:

$$v_i = \begin{cases} \gamma & i \neq i^* \\ -(N-1)\gamma & i = i^* \end{cases} \quad \forall i \in [N].$$

526 This observation gives us the following:

$$\begin{aligned} \mathbb{E} \left[ \sum_{t=1}^T p_t \cdot \widehat{\ell}_t - \mathbf{e}_{i^*} \cdot \sum_{t=1}^T \widehat{\ell}_t \right] &= \mathbb{E} \left[ \sum_{t=1}^T p_t \cdot \ell_t - \mathbf{e}_{i^*} \cdot \sum_{t=1}^T \ell_t \right] \\ &= \mathbb{E} \left[ \sum_{t=1}^T p_t \cdot \ell_t - p^\gamma \cdot \sum_{t=1}^T \ell_t \right] + v \cdot \mathbb{E} \left[ \sum_{t=1}^T \ell_t \right] \\ &= \mathbb{E} \left[ \sum_{t=1}^T p_t \cdot \widehat{\ell}_t - p^\gamma \cdot \sum_{t=1}^T \widehat{\ell}_t \right] + v \cdot \mathbb{E} \left[ \sum_{t=1}^T \ell_t \right], \end{aligned}$$

527 where the first equality is due to the fact that  $\widehat{\ell}_t$  is an unbiased estimator of  $\ell_t$ . We bound the last  
 528 term using the expression for  $v$ :

$$v \cdot \sum_{t=1}^T \ell_t = \sum_{t=1}^T \left[ \sum_{i \neq i^*} \gamma \ell_{t,i} - (N-1)\gamma \ell_{t,i^*} \right] \leq \gamma TN,$$

529 where in the last inequality we use the fact that the losses are bounded in  $[0, 1]$ . ■

530 We will also make use of general FTRL regret bound given by Theorem 3 (which we prove in  
 531 Appendix C) together with the stability and penalty bounds shown in the previous sections. Theorem 2  
 532 is restated here in the precise form proved below.

533 **Theorem 2 (restated).** Algorithm 1 attains the following regret bound, regardless of the corruption  
 534 level, for  $NT \geq 3^{11}$ :

$$\begin{aligned} \mathcal{R}_T &\leq 9K \log(NT) + 6 \log^2(NT) \sum_{t=1}^T \sum_{k \neq k^*} \sqrt{\frac{\mathbb{E}[p_t(V_k)]}{t}} \\ &\quad + 2 \log(NT) \sum_{t=1}^T \sqrt{\frac{\mathbb{E}[p_t(V_{k^*} \setminus i^*)]}{t}} + 16 \sum_{t=1}^T \sqrt{\frac{\mathbb{E}[p_t^+(V_{k^*} \setminus i^*)]}{t}}. \end{aligned} \quad (13)$$

535 *Proof.* Note that due to Lemma 9 it suffices to bound  $\mathbb{E} \left[ \sum_{t=1}^T (p_t - p^\gamma) \cdot \widehat{\ell}_t \right]$  where  $p^\gamma$  is defined by

$$p_i^\gamma = \begin{cases} \gamma & i \neq i^* \\ 1 - (N-1)\gamma & i = i^* \end{cases} \quad \forall i \in [N],$$

536 since it can only be larger than the pseudo-regret by an additive constant. Using Theorem 3 and then  
 537 bounding the penalty and stability terms using Lemma 4 and Lemma 5 we obtain

$$\mathcal{R}_T \leq 9K \log(NT) + \left( 5 \log^2(NT) + 112 \right) \sum_{t=1}^T \sum_{k \neq k^*} \sqrt{\frac{\mathbb{E}[p_t(V_k)]}{t}}$$

$$\begin{aligned}
& + 2 \log(NT) \sum_{t=1}^T \sqrt{\frac{\mathbb{E}[p_t(V_{k^*} \setminus i^*)]}{t}} + 16 \sum_{t=1}^T \sqrt{\frac{\mathbb{E}[p_t^+(V_{k^*} \setminus i^*)]}{t}} \\
& \leq 9K \log(NT) + 6 \log^2(NT) \sum_{t=1}^T \sum_{k \neq k^*} \sqrt{\frac{\mathbb{E}[p_t(V_k)]}{t}} \\
& + 2 \log(NT) \sum_{t=1}^T \sqrt{\frac{\mathbb{E}[p_t(V_{k^*} \setminus i^*)]}{t}} + 16 \sum_{t=1}^T \sqrt{\frac{\mathbb{E}[p_t^+(V_{k^*} \setminus i^*)]}{t}},
\end{aligned}$$

538 where the last inequality holds for  $NT \geq 3^{11}$ . ■

### 539 B.5 Proof of Theorem 1 (Main)

540 We can now provide a proof of our main result given in Theorem 1, restated here more precisely.

541 **Theorem 1** (restated). *Algorithm 1 attains the following expected pseudo-regret bound in the  $C$ -*  
542 *corrupted stochastic setting, for  $NT \geq 3^{11}$ :*

$$\mathcal{R}_T \leq 184 \log^2(NT) \cdot \min \left\{ \sqrt{KT}, \log^2(NT) \sum_{k: \Delta_k > 0} \frac{\log T}{\Delta_k} + \sqrt{C \sum_{k: \Delta_k > 0} \frac{\log T}{\Delta_k}} \right\}.$$

543 *Proof.* We first prove the following:

$$\mathcal{R}_T \leq 184 \log^4(NT) \sum_{k: \Delta_k > 0} \frac{\log T}{\Delta_k} + 28 \log^2(NT) \sqrt{C \sum_{k: \Delta_k > 0} \frac{\log T}{\Delta_k}}.$$

544 We proceed bounding the RHS of Eq. (13). For all  $B, z > 0$  we have

$$\begin{aligned}
B \sum_{t=1}^T \left( \sum_{k \neq k^*} \sqrt{\frac{\mathbb{E}[p_t(V_k)]}{t}} + \sqrt{\frac{\mathbb{E}[p_t(V_{k^*} \setminus i^*)]}{t}} \right) & \leq B^2 \cdot z \sum_{t=1}^T \sum_{k: \Delta_k > 0} \frac{1}{2t\Delta_k} + \frac{1}{2z} \sum_{t=1}^T \sum_{i=1}^N \mathbb{E}[p_{t,i}] \delta_i \\
& \leq B^2 \cdot z \sum_{k: \Delta_k > 0} \frac{\log T}{\Delta_k} + \frac{1}{2z} \sum_{t=1}^T \sum_{i=1}^N \mathbb{E}[p_{t,i}] \delta_i \\
& \leq B^2 \cdot z \sum_{k: \Delta_k > 0} \frac{\log T}{\Delta_k} + \frac{1}{2z} (\mathcal{R}_T + 2C), \tag{14}
\end{aligned}$$

545 where the first inequality is due to Young's inequality and the fact that  $\Delta_k \leq \delta_i$  for all  $i \in V_k$ , the  
546 second inequality is since  $\sum_{t=1}^T (1/t) \leq 2 \log T$  and the last inequality is due to the following simple  
547 observation which follows from the definition of corruption:

$$\begin{aligned}
\mathbb{E} \left[ \sum_{t=1}^T \sum_{i=1}^N p_{t,i} (\tilde{\ell}_{t,i} - \tilde{\ell}_{t,i^*}) \right] & \leq \mathbb{E} \left[ \sum_{t=1}^T \sum_{i=1}^N p_{t,i} (\ell_{t,i} - \ell_{t,i^*}) \right] + 2 \mathbb{E} \left[ \sum_{t=1}^T \|\ell_t - \tilde{\ell}_t\|_\infty \right] \\
& = \mathbb{E} \left[ \sum_{t=1}^T \sum_{i=1}^N p_{t,i} (\ell_{t,i} - \ell_{t,i^*}) \right] + 2C.
\end{aligned}$$

548 Setting  $B = 6 \log^2(NT)$  gives a bound on the second term in the RHS of Eq. (13). Similarly, we have

$$\begin{aligned}
16 \sum_{t=1}^T \sqrt{\frac{1}{t} \mathbb{E}[p_t^+(V_{k^*} \setminus i^*)]} & \leq 256z \sum_{k: \Delta_k > 0} \frac{\log T}{\Delta_k} + \frac{1}{2z} \sum_{t=1}^T \sum_{i=1}^N \mathbb{E}[p_{t,i}^+] \delta_i \\
& \leq 256z \sum_{k: \Delta_k > 0} \frac{\log T}{\Delta_k} + \frac{C}{z} + \frac{1}{2z} \mathbb{E} \left[ \sum_{t=1}^T \sum_{i=1}^N p_{t,i}^+ \cdot (\ell_{t,i} - \ell_{t,i^*}) \right]. \tag{15}
\end{aligned}$$



549 We now use Lemma 8 to bound the rightmost term of Eq. (15) as follows:

$$\begin{aligned}
\mathbb{E} \left[ \sum_{t=1}^T \sum_{i=1}^N p_{t,i}^+ \cdot (\ell_{t,i} - \ell_{t,i^*}) \right] &= \mathbb{E} \left[ \sum_{t=1}^T p_t^+ \cdot (\mathbb{E}_t[\widehat{\ell}_t] - \ell_{t,i^*} \mathbf{1}) \right] \\
&\leq \mathbb{E} \left[ \sum_{t=1}^T p_t \cdot (\mathbb{E}_t[\widehat{\ell}_t] - \ell_{t,i^*} \mathbf{1}) \right] \\
&= \mathbb{E} \left[ \sum_{t=1}^T \sum_{i=1}^N p_{t,i} \cdot (\ell_{t,i} - \ell_{t,i^*}) \right] \\
&= \mathcal{R}_T,
\end{aligned}$$

550 where we used the fact that  $\widehat{\ell}_t$  is an unbiased estimator for  $\ell_t$ . We can conclude that

$$16 \sum_{t=1}^T \sum_{k:\Delta_k>0} \sqrt{\frac{1}{t} \mathbb{E}[p_t^+(V_k)]} \leq 256 \sum_{k:\Delta_k>0} \frac{\log T}{\Delta_k} + \frac{1}{2z} (\mathcal{R}_T + 2C). \quad (16)$$

551 Using Theorem 2 and combining the bounds from Eq. (14) and Eq. (16) we obtain

$$\begin{aligned}
\mathcal{R}_T &\leq 9K \log(NT) + \left(36 \log^4(NT) + 256\right) z \sum_{k:\Delta_k>0} \frac{\log T}{\Delta_k} + \frac{1}{z} \mathcal{R}_T + \frac{2C}{z} \\
&\leq \left(45 \log^4(NT) + 256\right) z \sum_{k:\Delta_k>0} \frac{\log T}{\Delta_k} + \frac{1}{z} \mathcal{R}_T + \frac{2C}{z} \\
&\leq 46 \log^4(NT) z \sum_{k:\Delta_k>0} \frac{\log T}{\Delta_k} + \frac{1}{z} \mathcal{R}_T + \frac{2C}{z},
\end{aligned}$$

552 where the second inequality is since  $K \leq 1 + \sum_{k:\Delta_k>0} 1/\Delta_k$  and the last inequality holds since  
553  $NT \geq 3^4$ . Rearranging and simplifying we obtain

$$\mathcal{R}_T \leq 2U + (z-1)U + \frac{2C+U}{z-1},$$

554 where we denote  $U = 46 \log^4(NT) \sum_{k:\Delta_k>0} \log T/\Delta_k$  for simplicity. We now choose  $z$  which

555 minimizes the bound, by setting  $z = 1 + \sqrt{\frac{U+2C}{U}}$ . This gives us

$$\begin{aligned}
\mathcal{R}_T &\leq 2U + 2\sqrt{U(U+2C)} \\
&\leq 4U + 4\sqrt{UC} \\
&\leq 184 \log^2(NT) \sum_{k:\Delta_k>0} \frac{\log T}{\Delta_k} + 28 \log^2(NT) \sqrt{C \sum_{k:\Delta_k>0} \frac{\log T}{\Delta_k}},
\end{aligned}$$

556 which concludes the first part of the proof. We now show that

$$\mathcal{R}_T \leq 28 \log^2(NT) \sqrt{KT}.$$

557 We again use Theorem 2 and also the fact that  $p_t^+(V_k) \leq \frac{7}{3} p_t(V_k)$  by Lemma 7, to obtain

$$\begin{aligned}
\mathcal{R}_T &\leq 9K \log(NT) + \left(6 \log^2(NT) + 32\right) \sum_{t=1}^T \frac{1}{\sqrt{t}} \sum_{k=1}^K \sqrt{p_t(V_k)} \\
&\leq 9K \log(NT) + 7 \log^2(NT) \sum_{t=1}^T \frac{1}{\sqrt{t}} \sum_{k=1}^K \sqrt{p_t(V_k)},
\end{aligned}$$

558 where the inequality holds since  $NT \geq 3^6$ . We conclude the proof via the following straightforward  
559 calculation:

$$\sum_{t=1}^T \frac{1}{\sqrt{t}} \sum_{k=1}^K \sqrt{p_t(V_k)} \leq \sqrt{K} \sum_{t=1}^T \frac{1}{\sqrt{t}} \leq 2\sqrt{KT},$$

560 where we used Jensen's inequality and the fact that  $\sum_{t=1}^T (1/\sqrt{t}) \leq 2\sqrt{T}$ . We obtained two regret  
561 bounds and thus the minimum of the two holds, which concludes the proof. ■

## 562 C Refined Regret Bound for FTRL

563 Consider the FTRL framework which generates predictions  $w_1, w_2, \dots, w_T \in \mathcal{W}$  given a sequence of  
 564 arbitrary loss vectors  $g_1, g_2, \dots, g_T$  and a sequence of regularization functions  $H_1, H_2, \dots, H_T$ . The  
 565 following gives a general regret bound which we use in order to prove [Theorem 2](#).

566 **Theorem 3.** *Suppose  $H_t = \eta_t^{-1}\psi + \phi$  for twice-differentiable and convex functions  $\psi$  and  $\phi$ ,  $\psi$   
 567 being strictly convex. Let  $w_t^+ = \arg \min_{w \in \mathcal{W}} \{w \cdot \sum_{s=1}^t g_s + H_t(w)\}$ . Then there exists a sequence  
 568 of points  $\tilde{w}_t \in [w_t, w_t^+]$  such that, for all  $w^* \in \mathcal{W}$ :*

$$\sum_{t=1}^T g_t \cdot (w_t - w^*) \leq \phi(w^*) - \phi(w_1) + \sum_{t=1}^T \left( \frac{1}{\eta_t} - \frac{1}{\eta_{t-1}} \right) (\psi(w^*) - \psi(w_t)) + 2 \sum_{t=1}^T \eta_t (\|g_t\|_t^*)^2.$$

569 Here  $\|g\|_t = \sqrt{g^\top \nabla^2 \psi(\tilde{w}_t) g}$  is the local norm induced by  $\psi$  at  $\tilde{w}_t$ , and  $\|\cdot\|_t^*$  is its dual. Here we also  
 570 define  $1/\eta_0 \triangleq 0$ .

571 *Proof.* We directly follow an analysis by Jin and Luo [13], and include the details for completeness.  
 572 For simplicity we denote  $G_t = \sum_{s=1}^t g_s$ . We make the following definitions:

$$\begin{aligned} F_t(w) &= w \cdot G_{t-1} + H_t(w), \\ F_t^+(w) &= w \cdot G_t + H_t(w), \end{aligned}$$

573 such that  $w_t = \arg \min_{w \in \mathcal{W}} \{F_t(w)\}$  and  $w_t^+ = \arg \min_{w \in \mathcal{W}} \{F_t^+(w)\}$ . Fix  $w^* \in \mathcal{W}$ . We note that  
 574 the regret of FTRL with respect to  $w^*$  has the following decomposition:

$$\sum_{t=1}^T g_t \cdot (w_t - w^*) = \sum_{t=1}^T (w_t \cdot g_t + F_t(w_t) - F_t^+(w_t^+)) + \sum_{t=1}^T (F_t^+(w_t^+) - F_t(w_t) - w^* \cdot g_t).$$

575 We first show that for all time steps  $t$  it holds that

$$w_t \cdot g_t + F_t(w_t) - F_t^+(w_t^+) \leq 2\eta_t (\|g_t\|_t^*)^2. \quad (17)$$

576 We lower bound  $w_t \cdot g_t + F_t(w_t) - F_t^+(w_t^+)$  as follows:

$$\begin{aligned} w_t \cdot g_t + F_t(w_t) - F_t^+(w_t^+) &= w_t \cdot G_t + H_t(w_t) - F_t^+(w_t^+) \\ &= F_t^+(w_t) - F_t^+(w_t^+) \\ &= \nabla F_t^+(w_t^+) \cdot (w_t - w_t^+) + \frac{1}{2} \|w_t - w_t^+\|_{\nabla^2 H_t(\tilde{w}_t)}^2 \\ &\geq \frac{1}{2} \|w_t - w_t^+\|_{\nabla^2 H_t(\tilde{w}_t)}^2 \\ &\geq \frac{1}{2} \eta_t^{-1} \|w_t - w_t^+\|_t^2, \end{aligned}$$

577 where the third line is a Taylor expansion of  $F_t^+$  around  $w_t^+$ , with  $\tilde{w}_t$  being a point between  $w_t$  and  
 578  $w_t^+$ , in the second to last line we use a first-order optimality condition of  $w_t^+$ , and in the last line we  
 579 use the fact that  $\nabla^2 H_t \geq \eta_t^{-1} \nabla^2 \psi$ . We now upper bound  $w_t \cdot g_t + F_t(w_t) - F_t^+(w_t^+)$  as follows:

$$\begin{aligned} w_t \cdot g_t + F_t(w_t) - F_t^+(w_t^+) &= (w_t - w_t^+) \cdot g_t + F_t(w_t) - F_t(w_t^+) \\ &\leq (w_t - w_t^+) \cdot g_t \\ &\leq \left( \sqrt{\eta_t^{-1}} \|w_t - w_t^+\|_t \right) (\sqrt{\eta_t} \|g_t\|_t^*) \\ &= \|w_t - w_t^+\|_t \cdot \|g_t\|_t^*, \end{aligned}$$

580 where in the first inequality we use the fact that  $w_t$  is the minimizer of  $F_t$  and the second inequality  
 581 is an application of Hölder's inequality. Combining the lower and upper bounds gives us Eq. (17).  
 582 Next we show that

$$\sum_{t=1}^T (F_t^+(w_t^+) - F_t(w_t) - w^* \cdot g_t) \leq \phi(w^*) - \phi(w_1) + \sum_{t=1}^T \left( \frac{1}{\eta_t} - \frac{1}{\eta_{t-1}} \right) (\psi(w^*) - \psi(w_t)). \quad (18)$$

583 We bound the LHS of Eq. (18) as follows:

$$\begin{aligned}
& \sum_{t=1}^T (F_t^+(w_t^+) - F_t(w_t) - w^\star \cdot g_t) \\
& \leq -F_1(w_1) + \sum_{t=2}^T (F_{t-1}^+(w_t) - F_t(w_t)) + F_T^+(w_T^+) - w^\star \cdot G_T \\
& \leq -F_1(w_1) + \sum_{t=2}^T (F_{t-1}^+(w_t) - F_t(w_t)) + F_T^+(w^\star) - w^\star \cdot G_T \\
& = -H_1(w_1) - \sum_{t=2}^T \left( \frac{1}{\eta_t} - \frac{1}{\eta_{t-1}} \right) \psi(w_t) + H_T(w^\star) \\
& = -\eta_1^{-1} \psi(w_1) - \phi(w_1) - \sum_{t=2}^T \left( \frac{1}{\eta_t} - \frac{1}{\eta_{t-1}} \right) \psi(w_t) + \eta_T^{-1} \psi(w^\star) + \phi(w^\star) \\
& = \phi(w^\star) - \phi(w_1) + \sum_{t=1}^T \left( \frac{1}{\eta_t} - \frac{1}{\eta_{t-1}} \right) (\psi(w^\star) - \psi(w_t)),
\end{aligned}$$

584 where in the first and second inequalities we use the optimality of  $w_t^+$ . Combining Eq. (17) and  
585 Eq. (18) we conclude the proof. ■

586 *Proof of Lemma 3.* Fix any  $p^\gamma \in \mathcal{S}_N^\gamma$ . The lemma follows immediately by applying Theorem 3 to  
587 Algorithm 1 with the regularizations  $R_1, R_2, \dots, R_T$  and the shifted loss estimators  $\ell_t - \ell_{t,i^\star} \mathbf{1}$ , while  
588 noting that constant shifts in the loss estimators do not change the algorithm whatsoever. ■
